# Supplementary material
Source: PubMed Central journal article supplement (PMC4758892)

# Supplemental Figure 1

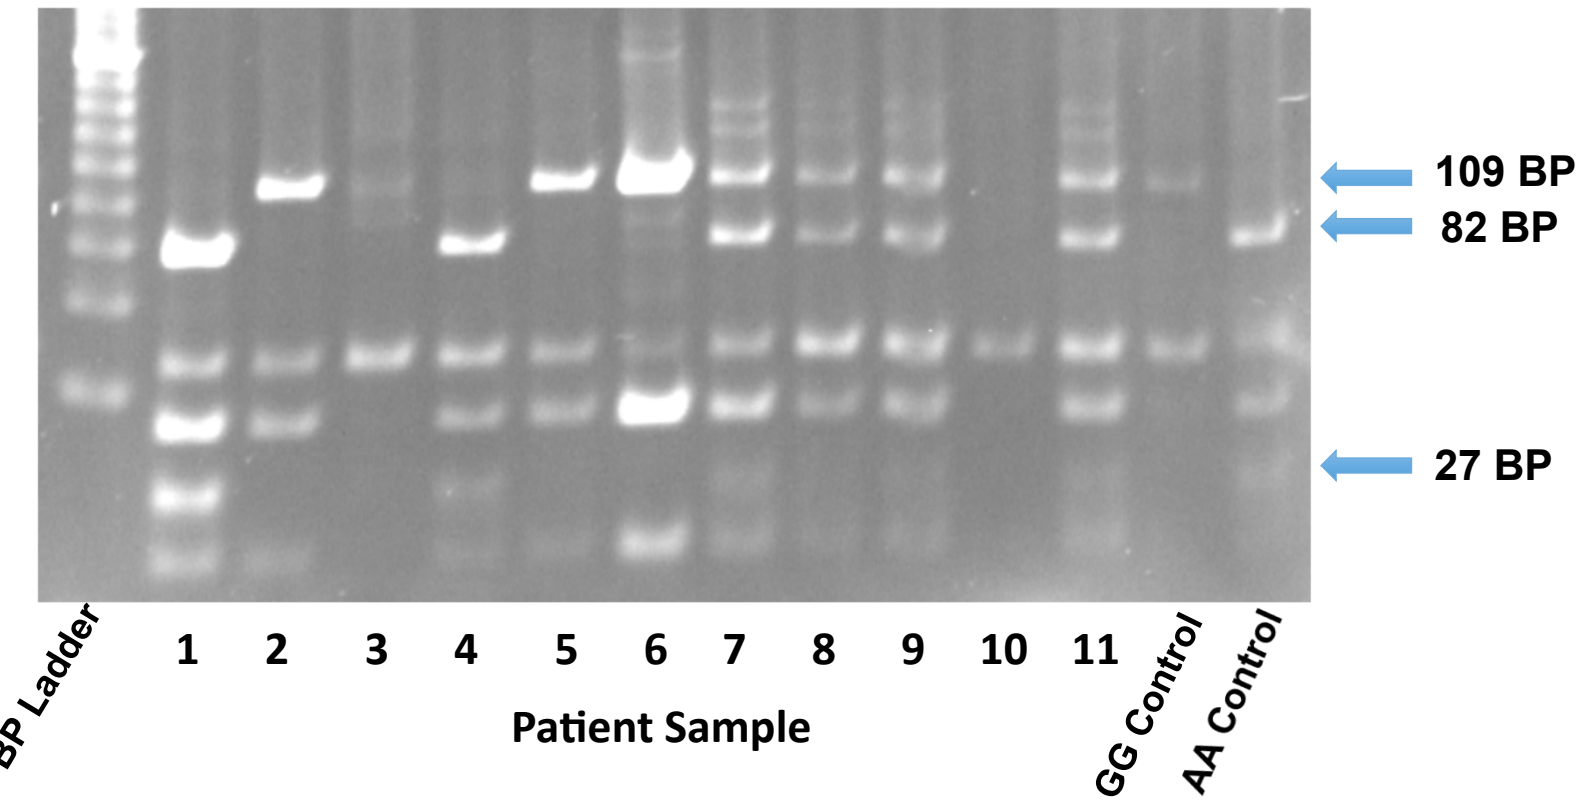

Supplement: NIHMS747395-supplement-Supplemental_Figure_1.pdf [file NIHMS747395-supplement-Supplemental_Figure_1.pdf]

# Supplemental Figure 2

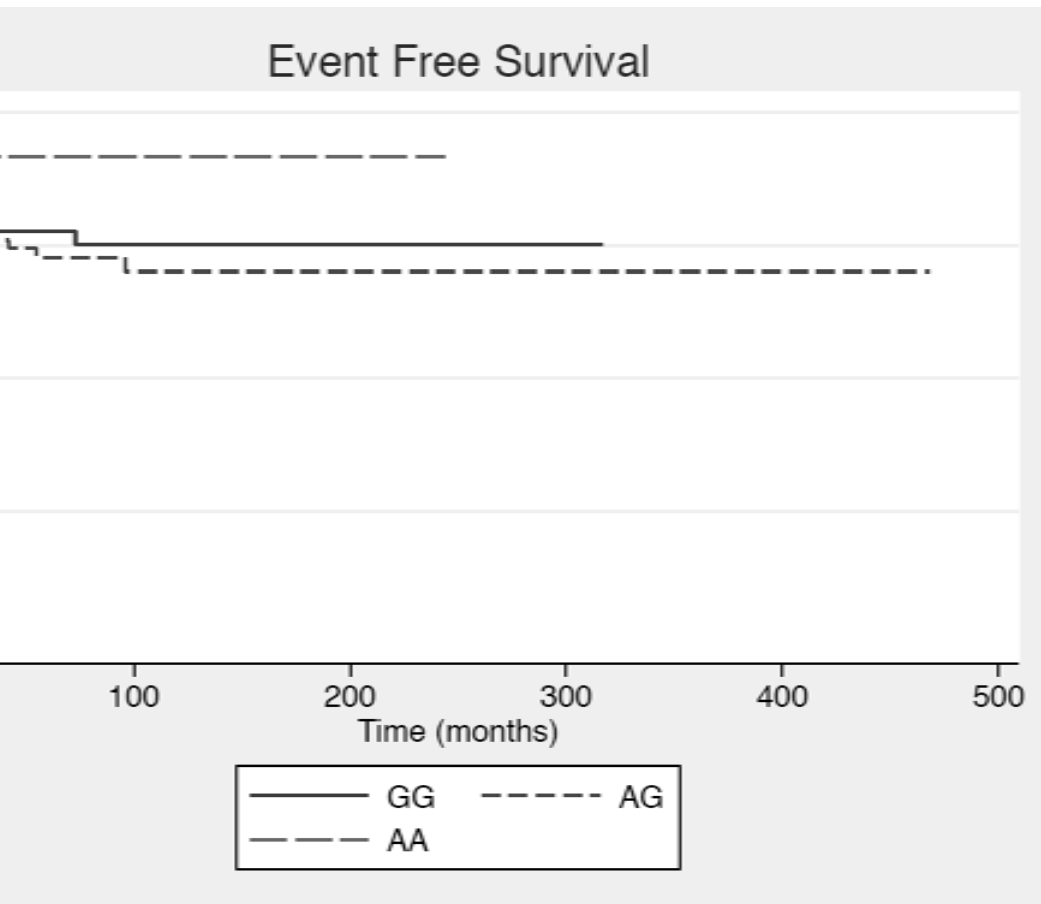

**B**

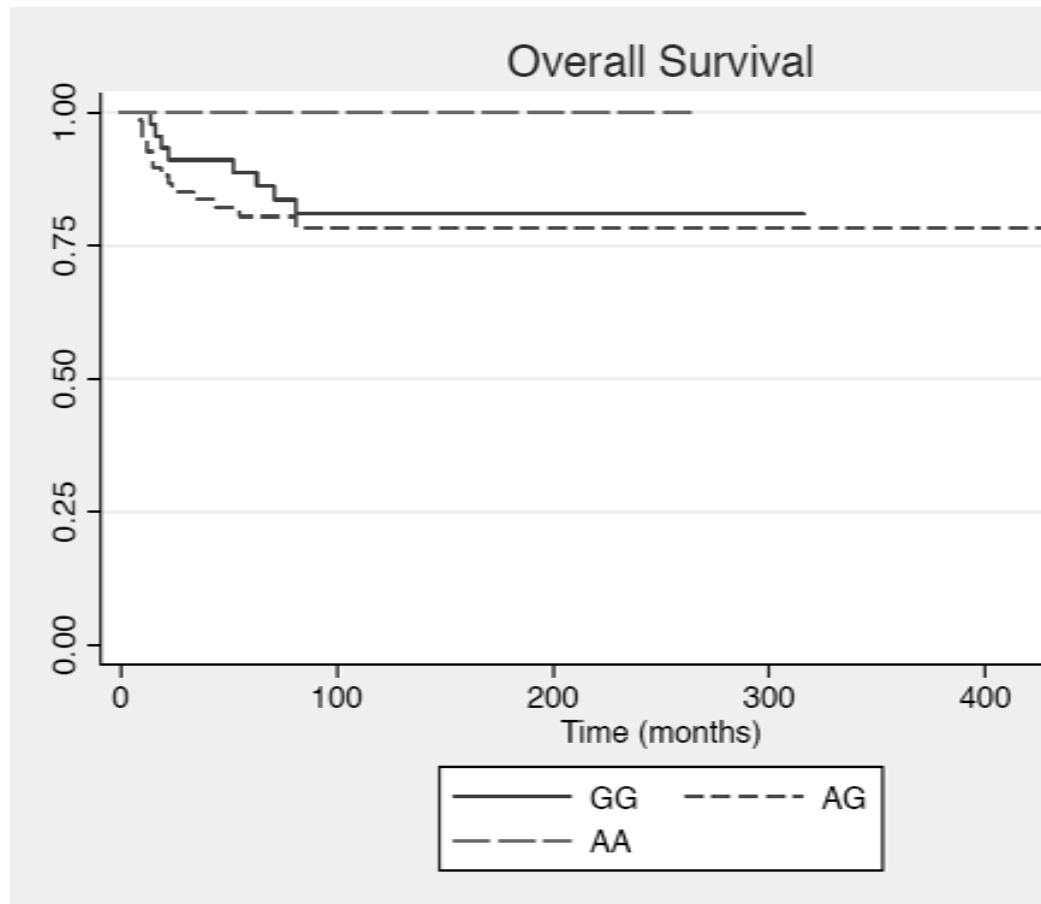

Supplement: NIHMS747395-supplement-Supplemental_Figure_2.pdf [file NIHMS747395-supplement-Supplemental_Figure_2.pdf]
